# Supplementary material for: Citrus sinensis and Vitis vinifera Protect Cardiomyocytes from Doxorubicin-Induced Oxidative Stress: Evaluation of Onconutraceutical Potential of Vegetable Smoothies
Source: PubMed Central journal article supplement (PMC7278676; doi:10.3390/antiox9050378), 2020-05-02
Supplement: antioxidants-09-00378-s001.pdf [file antioxidants-09-00378-s001.pdf]

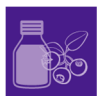

## Supplementary Materials

# Citrus sinensis and Vitis vinifera protect cardiomyocytes from doxorubicin-induced oxidative stress: evaluation of onconutraceutical potential of vegetable smoothies

Giacomo Pepe <sup>1</sup>, Emanuela Salviati <sup>1,2</sup>, Shara Francesca Rapa <sup>1</sup>, Carmine Ostacolo <sup>3</sup>, Stella Cascioferro <sup>4</sup>, Michele Manfra <sup>5</sup>, Giuseppina Autore <sup>1</sup>, Stefania Marzocco <sup>1,\*</sup> and Pietro Campiglia <sup>1,6\*</sup>

<sup>1</sup> Department of Pharmacy, University of Salerno, Fisciano, Italy; [gipepe@unisa.it](mailto:gipepe@unisa.it) (G.P.); [esalviati@unisa.it](mailto:esalviati@unisa.it) (E.S.); [srapa@unisa.it](mailto:srapa@unisa.it) (S.F.R.); [autore@unisa.it](mailto:autore@unisa.it) (G.A.); [smarzocco@unisa.it](mailto:smarzocco@unisa.it) (S.M.); [pcampiglia@unisa.it](mailto:pcampiglia@unisa.it) (P.C.)

<sup>2</sup> PhD Program in Drug Discovery and Development, University of Salerno, Fisciano, Italy

<sup>3</sup> Department of Pharmacy, University of Naples Federico II, NA, Italy; [ostacolo@unina.it](mailto:ostacolo@unina.it)

<sup>4</sup> Dipartimento di Scienze e Tecnologie Biologiche, Chimiche e Farmaceutiche (STEBICEF), University of Palermo, PA, Italy; [stellamaria.cascioferro@unipa.it](mailto:stellamaria.cascioferro@unipa.it)

<sup>5</sup> Department of Science, University of Basilicata, Viale dell'Ateneo Lucano 10, I-85100 Potenza, Italy; [michele.manfra@unibas.it](mailto:michele.manfra@unibas.it)

<sup>6</sup> European Biomedical Research Institute of Salerno, SA, Italy

\* Correspondence: [smarzocco@unisa.it](mailto:smarzocco@unisa.it) (S.M.); [pcampiglia@unisa.it](mailto:pcampiglia@unisa.it) (P.C.)

Tel.: +39-089-96-9250 (S.M.); +39-089-96-9242 (P.C.)

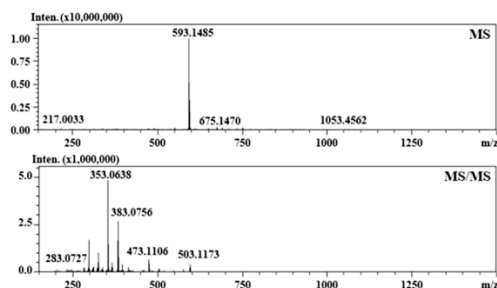

(a)

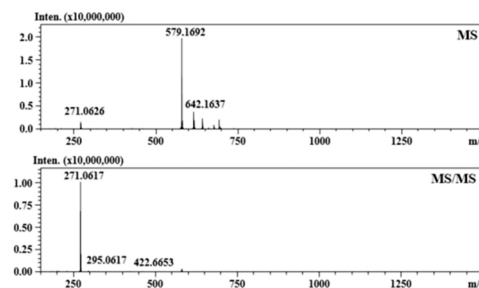

(b)

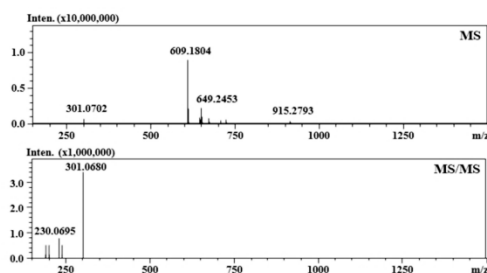

(c)

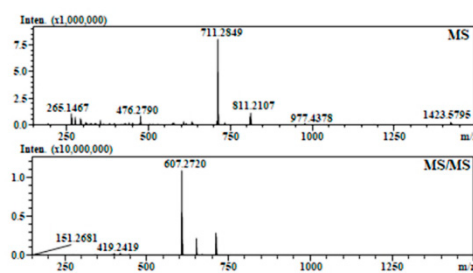

(d)

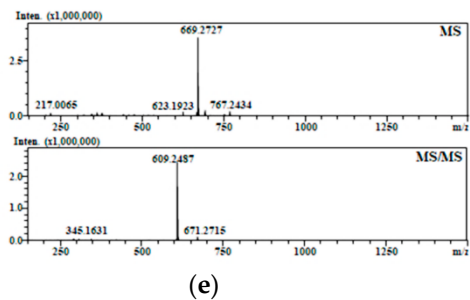

**Figure S1.** MS (top) and MS/MS (bottom) spectra of (a) apigenin 6,8-C-β-D-glucopyranoside, (b) narirutin, (c) hesperidin, (d) nomilinic acid glycoside and (e) deacetyl-nomilinic acid glycoside.

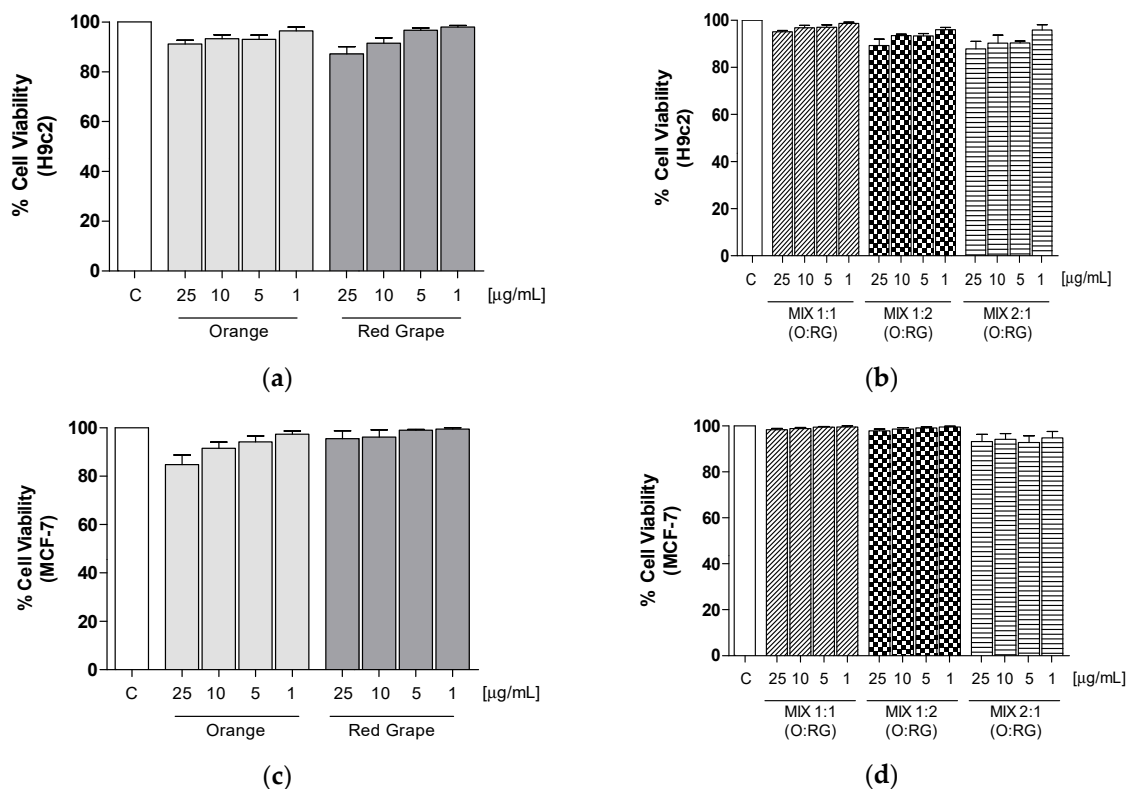

**Figure S2.** Effect of orange and red grapes extracts, and the 3 relative mixtures (25 – 1 μg/mL) alone on viability of H9c2 (a, b) and MCF-7 (c, d) cells. Data are expressed as mean ± S.E.M. of % of cell viability.

**Table S1.** Qualitative profile of polyphenols isolated in *Citrus sinensis* smoothie.

| Peak | Rt (min) | Molecular Formula                               | Compound                                             | [M-H] <sup>-</sup> | MS/MS                                     | Error (ppm) |
|------|----------|-------------------------------------------------|------------------------------------------------------|--------------------|-------------------------------------------|-------------|
| 1    | 1.20     | C <sub>7</sub> H <sub>12</sub> O <sub>6</sub>   | quinic acid                                          | 191.0241           | 173.0132                                  | -5.76       |
| 2    | 1.21     | C <sub>16</sub> H <sub>19</sub> O <sub>9</sub>  | caffeoylquinic acid                                  | 353.0736           | 173.0147                                  | -2.35       |
| 3    | 4.52     | C <sub>15</sub> H <sub>18</sub> O <sub>8</sub>  | 5-p-coumaroyl-hexoside acid                          | 325.0945           | 163.0311, 191.0570                        | -4.92       |
| 4    | 5.30     | C <sub>16</sub> H <sub>20</sub> O <sub>9</sub>  | ferulic acid 4-O-glucoside                           | 355.1026           | 175.0549, 193.0527,                       | -2.53       |
| 5    | 5.55     | C <sub>16</sub> H <sub>18</sub> O <sub>11</sub> | ferulic acid hexoside                                | 385.0757           | 191.0102                                  | -4.93       |
| 6    | 5.65     | C <sub>33</sub> H <sub>40</sub> O <sub>21</sub> | quercetin<br>3-O-glucosyl-rhamnosyl-hexoside         | 771.2018           | 301.0359, 609.1374,<br>271.0196           | -4.28       |
| 7    | 6.75     | C <sub>27</sub> H <sub>30</sub> O <sub>15</sub> | vicenin II (qpigenin<br>6,8-C-β-D-glucopyranoside)   | 593.1466           | 503.1173, 473.1107,<br>353.0692,383.0805, | 2.19        |
| 8    | 7.15     | C <sub>21</sub> H <sub>22</sub> O <sub>10</sub> | naringenin hexoside                                  | 433.1130           | 271.0631,                                 | -0.85       |
| 9    | 7.87     | C <sub>28</sub> H <sub>32</sub> O <sub>16</sub> | lucenin 2-4'-methyl-ether                            | 623.1581           | 383.0751, 312.0561                        | 3.70        |
| 10   | 9.04     | C <sub>27</sub> H <sub>32</sub> O <sub>15</sub> | eriocitrin                                           | 595.1631           | 287.0542                                  | -1.96       |
| 11   | 9.29     | C <sub>33</sub> H <sub>40</sub> O <sub>21</sub> | quercetin<br>3-O-glucosyl-rhamnosyl-hexoside         | 771.2360           | 301.0704, 463.1202                        | -4.28       |
| 12   | 9.32     | C <sub>21</sub> H <sub>20</sub> O <sub>12</sub> | quercetin-3-O-hexoside                               | 463.1342           | 301.0706                                  | 3.81        |
| 13   | 10.05    | C <sub>26</sub> H <sub>28</sub> O <sub>14</sub> | apigenin 7-O-apiosyl-glucoside                       | 563.1366           | 293.0344, 413.0874                        | -4.90       |
| 14   | 10.75    | C <sub>27</sub> H <sub>30</sub> O <sub>16</sub> | rutin                                                | 609.1472           | 301.0335, 271.0237                        | -3.89       |
| 15   | 11.63    | C <sub>27</sub> H <sub>32</sub> O <sub>14</sub> | narirutin                                            | 579.1703           | 271.0590                                  | -4.19       |
| 16   | 12.25    | C <sub>33</sub> H <sub>40</sub> O <sub>19</sub> | naringenin<br>3-O-glucosyl-rhamnosyl-hexoside        | 739.2122           | 433.1115, 577.1521,<br>271.0605           | -2.22       |
| 17   | 12.76    | C <sub>27</sub> H <sub>32</sub> O <sub>14</sub> | naringenin 7-O-neohesperidoside                      | 579.1688           | 271.0669, 357.0802                        | -1.51       |
| 18   | 13.85    | C <sub>28</sub> H <sub>34</sub> O <sub>15</sub> | hesperidin                                           | 609.1798           | 301.0679                                  | -4.43       |
| 19   | 14.07    | C <sub>32</sub> H <sub>42</sub> O <sub>14</sub> | limonin glucoside (limonin<br>17β-D-glucopyranoside) | 649.2479           | 443.2036,<br>605.2564,651.2506            | -1.45       |
| 20   | 14.44    | C <sub>28</sub> H <sub>32</sub> O <sub>16</sub> | isorhamnetin 3-O-rutinoside                          | 623.1591           | 315.0512, 311.0222,<br>271.0239           | -2.35       |
| 21   | 15.19    | C <sub>28</sub> H <sub>34</sub> O <sub>15</sub> | hesperidin isomer                                    | 609.1782           | 301.0702                                  | -6.37       |
| 22   | 15.50    | C <sub>28</sub> H <sub>34</sub> O <sub>15</sub> | hesperidin isomer                                    | 609.1798           | 301.0785                                  | -6.37       |
| 23   | 17.70    | C <sub>39</sub> H <sub>42</sub> O <sub>10</sub> | deacetyl-nomilinic acid glycoside                    | 669.2720           | 609.2463                                  | 2.24        |
| 24   | 20.59    | C <sub>28</sub> H <sub>34</sub> O <sub>14</sub> | didymin                                              | 593.1848           | 285.0772                                  | 2.72        |
| 25   | 21.90    | C <sub>34</sub> H <sub>46</sub> O <sub>15</sub> | nomilin glucoside                                    | 693.2736           | 565.2589,<br>395.1648,445.2121            | -4.04       |
| 26   | 21.92    | C <sub>34</sub> H <sub>48</sub> O <sub>14</sub> | nomilinic acid-glycoside                             | 711.2834           | 607.2710                                  | -3.80       |

**Table S2.** RP-UHPLC-UV/Vis-ESI-IT-TOF identification of anthocyanins isolated from *Vitis vinifera* L. cv. Aglianico N. smoothie.

| Peak | Rt (min) | Molecular Formula                                            | Compound                                 | [M+H] <sup>+</sup> | Error (ppm) |
|------|----------|--------------------------------------------------------------|------------------------------------------|--------------------|-------------|
| 1    | 4.34     | C <sub>21</sub> H <sub>21</sub> O <sub>12</sub> <sup>+</sup> | delphinidin 3 O-glucoside                | 465.1037           | 1.94        |
| 2    | 4.78     | C <sub>21</sub> H <sub>21</sub> O <sub>11</sub> <sup>+</sup> | cyanidin 3 O-glucoside                   | 449.1095           | 5.57        |
| 3    | 5.13     | C <sub>22</sub> H <sub>23</sub> O <sub>12</sub> <sup>+</sup> | petunidin 3 O-glucoside                  | 479.1202           | 3.76        |
| 4    | 5.58     | C <sub>22</sub> H <sub>22</sub> O <sub>11</sub> <sup>+</sup> | peonidin 3 O-glucoside                   | 463.1258           | 4.97        |
| 5    | 5.86     | C <sub>23</sub> H <sub>25</sub> O <sub>12</sub> <sup>+</sup> | malvidin 3 O-glucoside                   | 493.1349           | 2.50        |
| 6    | 7.32     | C <sub>24</sub> H <sub>24</sub> O <sub>13</sub> <sup>+</sup> | petunidin 3 O-(6'' acetyl) glucoside     | 521.1238           | 3.75        |
| 7    | 7.29     | C <sub>24</sub> H <sub>24</sub> O <sub>13</sub> <sup>+</sup> | peonidin 3 O-(6'' acetyl) glucoside      | 505.1365           | 4.07        |
| 8    | 7.77     | C <sub>24</sub> H <sub>24</sub> O <sub>13</sub> <sup>+</sup> | malvidin 3 O-(6'' acetyl) glucoside      | 535.1493           | 1.96        |
| 9    | 8.29     | C <sub>32</sub> H <sub>30</sub> O <sub>15</sub> <sup>+</sup> | malvidin 3 O-(6''-p-caffeoyl) glucoside  | 655.1943           | 3.78        |
| 10   | 8.60     | C <sub>31</sub> H <sub>28</sub> O <sub>14</sub> <sup>+</sup> | petunidin 3-(6-coumaroyl) O-glucoside    | 625.1587           | 2.44        |
| 11   | 9.10     | C <sub>31</sub> H <sub>28</sub> O <sub>13</sub> <sup>+</sup> | peonidin 3-(6-coumaroyl) O-glucoside     | 609.1658           | 3.89        |
| 12   | 9.19     | C <sub>32</sub> H <sub>30</sub> O <sub>14</sub> <sup>+</sup> | malvidin 3 O-(6''-p-coumaroil) glucoside | 639.1747           | 4.67        |
